# Supplementary material for: The conformation and orientational order of a 1,2-disubstituted ethane nematogenic molecule (I22) in liquid crystalline and isotropic phases studied by NMR spectroscopy
Source: Royal Society of Chemistry journal article supplement (doi:10.1039/b915587b), 2010-01-01
Supplement: b915587b.pdf [file b915587b.pdf]

## Supplementary Information for

### **The conformation and orientational order of a 1,2-disubstituted ethane nematogenic molecule (I22) in liquid crystalline and isotropic phases**

#### **studied by NMR spectroscopy**

by

James W. Emsley<sup>1\*</sup>, Philippe Lesot<sup>2</sup>, Anne Lesage<sup>3</sup>, Giuseppina De Luca<sup>4</sup>, Denis Merlet<sup>2</sup>

and Giuseppe Pileio<sup>1</sup>

1. School of Chemistry, University of Southampton, Southampton, SO17 1BJ, UK.
2. Laboratoire de Chimie Structurale Organique, RMN en Milieu Orienté, Université Paris-Sud 11, ICMMO, UMR CNRS 8182, Bât. 410, F-91405 Orsay cedex, France.
3. Université de Lyon, CNRS/ ENS Lyon/ UCB-Lyon 1, Centre RMN à Très Hauts Champs, 5 rue de la Doua, 69100 Villeurbanne, France.
4. Dipartimento di Chimica, Università della Calabria, 87030 Arcavacata di Rende, Italy.

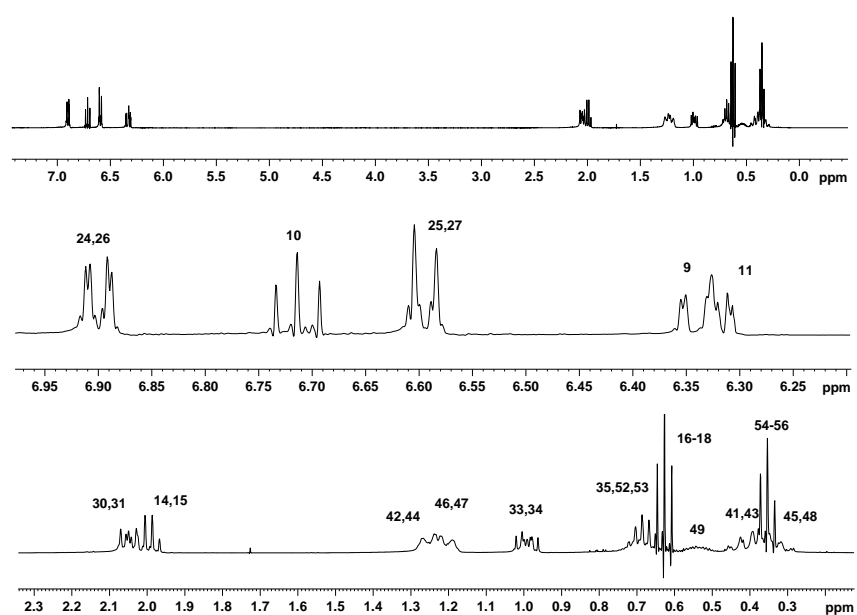

**Figure S1.** 400 MHz  $^1\text{H}$  spectrum of a sample of **I22** in the isotropic phase at 373 K. The spectrum is the result of Fourier transforming 16 free induction decays using 16K data points. Gaussian apodisation was applied.

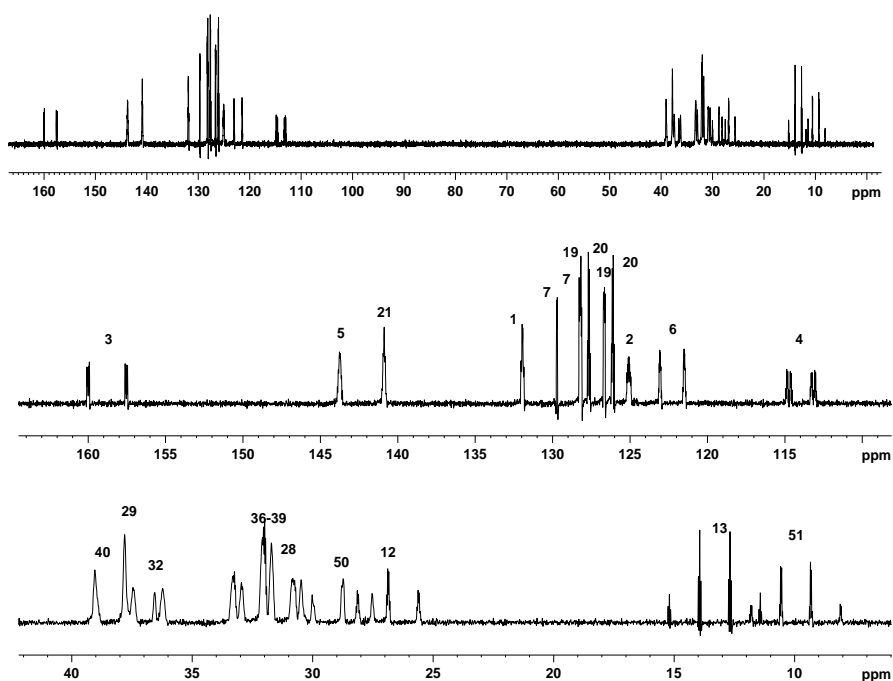

**Figure S2.** 100 MHz  $^{13}\text{C}$  spectrum of a sample of **I22** in the isotropic phase at 373 K. The spectrum is the result of Fourier transforming 2048 free induction decays using 16K data points. A zero filling to 64K data points and a Gaussian apodisation was applied prior to Fourier transformation.

**Table S1.** The bond lengths,  $r_{ij}$ , the bond angles,  $\theta_{ijk}$ , and dihedral angles,  $\phi_{ijks}$ , of **I22** calculated by the DFT method B3LYP/6-31G\*.

| $i$ | $j$ | $r_{ij}/\text{\AA}$ | $k$ | $\theta_{ijk}/^\circ$ | $s$ | $\phi_{ijks}/^\circ$ |
|-----|-----|---------------------|-----|-----------------------|-----|----------------------|
| 2   | 1   | 1.484               |     |                       |     |                      |
| 3   | 2   | 1.402               | 1   | 123.05                |     |                      |
| 4   | 3   | 1.388               | 2   | 123.30                | 1   | 179.08               |
| 5   | 4   | 1.399               | 3   | 120.23                | 2   | -0.06                |
| 6   | 5   | 1.401               | 4   | 117.81                | 3   | 0.19                 |
| 7   | 2   | 1.406               | 3   | 115.53                | 4   | -0.13                |
| 8   | 3   | 1.355               | 2   | 119.40                | 1   | -0.46                |
| 9   | 4   | 1.086               | 3   | 118.45                | 2   | 180.19               |
| 10  | 7   | 1.086               | 2   | 118.43                | 1   | 2.55                 |
| 11  | 6   | 1.087               | 5   | 119.54                | 4   | 179.03               |
| 12  | 5   | 1.514               | 4   | 120.83                | 3   | 181.83               |
| 13  | 12  | 1.540               | 5   | 112.81                | 4   | 88.33                |
| 14  | 12  | 1.097               | 5   | 109.38                | 13  | 121.70               |
| 15  | 12  | 1.097               | 5   | 109.60                | 13  | -121.86              |
| 16  | 13  | 1.096               | 12  | 110.85                | 5   | 179.89               |
| 17  | 13  | 1.096               | 12  | 111.01                | 5   | -59.94               |
| 18  | 13  | 1.096               | 12  | 110.98                | 5   | 59.71                |
| 19  | 1   | 1.405               | 2   | 121.97                | 3   | 40.57                |
| 20  | 19  | 1.392               | 1   | 120.84                | 2   | 178.81               |
| 21  | 20  | 1.401               | 19  | 121.47                | 1   | 0.33                 |
| 22  | 21  | 1.400               | 20  | 117.64                | 19  | -0.37                |
| 23  | 22  | 1.393               | 21  | 121.20                | 20  | 0.26                 |
| 24  | 19  | 1.084               | 1   | 119.64                | 2   | -0.60                |
| 25  | 20  | 1.088               | 19  | 119.18                | 1   | 180.56               |
| 26  | 23  | 1.087               | 1   | 119.46                | 2   | 2.34                 |
| 27  | 22  | 1.088               | 21  | 119.45                | 20  | 179.79               |
| 28  | 21  | 1.513               | 20  | 121.02                | 19  | 177.25               |
| 29  | 28  | 1.544               | 21  | 112.34                | 20  | -86.22               |
| 30  | 28  | 1.098               | 21  | 109.60                | 29  | 121.15               |
| 31  | 28  | 1.097               | 21  | 109.43                | 29  | -122.28              |
| 32  | 29  | 1.540               | 28  | 115.20                | 21  | 175.16               |
| 33  | 29  | 1.100               | 28  | 108.99                | 32  | 123.46               |
| 34  | 29  | 1.099               | 28  | 108.21                | 32  | -121.85              |
| 35  | 32  | 1.103               | 29  | 107.78                | 33  | 182.20               |
| 36  | 32  | 1.541               | 29  | 113.32                | 35  | 118.91               |
| 37  | 32  | 1.541               | 29  | 110.58                | 35  | -117.19              |
| 38  | 36  | 1.538               | 32  | 112.25                | 37  | 53.80                |
| 39  | 37  | 1.536               | 32  | 112.53                | 36  | -54.03               |
| 40  | 38  | 1.540               | 36  | 112.04                | 32  | -55.71               |
| 41  | 36  | 1.101               | 32  | 108.78                | 35  | 176.02               |
| 42  | 36  | 1.097               | 32  | 110.49                | 35  | 59.56                |
| 43  | 37  | 1.101               | 32  | 108.84                | 35  | 183.99               |
| 44  | 37  | 1.098               | 32  | 109.70                | 35  | -60.10               |

|    |    |       |    |        |    |         |
|----|----|-------|----|--------|----|---------|
| 45 | 38 | 1.101 | 36 | 108.88 | 32 | 65.69   |
| 46 | 38 | 1.099 | 36 | 109.85 | 32 | 181.82  |
| 47 | 39 | 1.099 | 37 | 109.96 | 32 | 178.22  |
| 48 | 39 | 1.100 | 37 | 108.92 | 32 | -65.54  |
| 49 | 40 | 1.103 | 38 | 106.80 | 36 | -60.28  |
| 50 | 40 | 1.540 | 38 | 113.35 | 36 | 179.89  |
| 51 | 50 | 1.533 | 40 | 116.40 | 38 | 171.70  |
| 52 | 50 | 1.100 | 40 | 108.97 | 51 | 123.25  |
| 53 | 50 | 1.099 | 40 | 108.40 | 51 | -121.92 |
| 54 | 51 | 1.096 | 50 | 110.92 | 40 | 183.21  |
| 55 | 51 | 1.097 | 50 | 111.11 | 54 | 119.61  |
| 56 | 51 | 1.097 | 50 | 112.06 | 54 | -119.94 |

**Table S2.** The local interaction parameters,  $\varepsilon_{ij}(\text{ring}I,N)/RT$ , the bond lengths,  $r_{ij}/\text{\AA}$ , and bond angles.  $\theta_{ijk}/^\circ$  obtained by fitting calculated to observed dipolar couplings within the fluorinated aromatic ring in **I22** when the sample is in the nematic phase at 293 K. The bond lengths and angles optimised for the non-fluorinated ring are also given.

Interaction parameters /RT

|                     |                    |                   |
|---------------------|--------------------|-------------------|
| $\varepsilon_{12}$  | $(\text{ring}I,N)$ | $3.72 \pm 0.090$  |
| $\varepsilon_{3,7}$ | $(\text{ring}I,N)$ | $0.055 \pm 0.025$ |
| $\varepsilon_{3,8}$ | $(\text{ring}I,N)$ | $0.045 \pm 0.051$ |

Geometrical parameters

|                                       |                   |
|---------------------------------------|-------------------|
| $r_{3,8} =$                           | $1.393 \pm 0.016$ |
| $r_{6,11} =$                          | $1.097 \pm 0.013$ |
| $r_{7,10} =$                          | $1.071 \pm 0.010$ |
| $r_{19,24} = r_{23,26}$               | $1.073 \pm 0.009$ |
| $r_{20,25} = r_{22,27}$               | $1.074 \pm 0.016$ |
| $\theta_{8,3,2}$                      | $119.9 \pm 0.5$   |
| $\theta_{9,4,3}$                      | $119.6 \pm 0.3$   |
| $\theta_{11,6,5}$                     | $119.9 \pm 0.5$   |
| $\theta_{10,7,2}$                     | $117.3 \pm 0.4$   |
| $\theta_{24,19,1} = \theta_{26,23,1}$ | $119.5 \pm 0.1$   |

**Table S3.** Local interaction parameters obtained for the fluorinated ring in **I22** in the chiral nematic phase,  $\varepsilon_{ij}(\text{ring1}, \text{Ch})$ , and in the isotropic phase,  $\varepsilon_{ij}(\text{ring1}, \text{iso})$ .

|                                                  |                                                  |                                                  |
|--------------------------------------------------|--------------------------------------------------|--------------------------------------------------|
| $\varepsilon_{1,2}(\text{ring1}, \text{Ch})/RT$  | $\varepsilon_{3,7}(\text{ring1}, \text{Ch})/RT$  | $\varepsilon_{3,8}(\text{ring1}, \text{Ch})/RT$  |
| $0.097 \pm 0.004$                                | $-0.011 \pm 0.007$                               | $0.007 \pm 0.004$                                |
| $\varepsilon_{1,2}(\text{ring1}, \text{iso})/RT$ | $\varepsilon_{3,7}(\text{ring1}, \text{iso})/RT$ | $\varepsilon_{3,8}(\text{ring1}, \text{iso})/RT$ |
| $0.097 \pm 0.004$                                | $-0.011 \pm 0.007$                               | $0.007 \pm 0.004$                                |

**Table S4.** The local interaction,  $\varepsilon_{i,j}(\text{ring-ethyl}, N)/RT$ , and geometrical parameters for the ring-ethyl fragment of **I22** obtained by fitting calculated to observed residual dipolar couplings for the nematic phase at 293 K.

*Interaction parameters*

|                                                |                  |
|------------------------------------------------|------------------|
| $\varepsilon_{1,2}(\text{ring-ethyl}, N)/RT$   | $3.53 \pm 0.02$  |
| $\varepsilon_{5,13}(\text{ring-ethyl}, N)/RT$  | $0.87 \pm 0.04$  |
| $\varepsilon_{14,15}(\text{ring-ethyl}, N)/RT$ | $0.67 \pm 0.2$   |
| $\varepsilon_{3,8}(\text{ring-ethyl}, N)/RT$   | $-0.02 \pm 0.03$ |

*Geometric parameters*

|                                |                 |
|--------------------------------|-----------------|
| $\theta_{5,12,13} / ^\circ$    | $115.7 \pm 0.2$ |
| $\theta_{14,12,5} / ^\circ$    | $109.6 \pm 0.1$ |
| $\delta_{14,12,5,13} / ^\circ$ | $119.6 \pm 0.1$ |

**Table S5.** The local interaction coefficients,  $\varepsilon_{ij}(\text{ethane1}, N)/RT$ , and the geometrical parameters obtained by fitting calculated to observed residual dipolar couplings to the rigid fragment ethane1 of **I22** in the nematic phase.

|                                                  |       |
|--------------------------------------------------|-------|
| $r_{28,30} = r_{28,31} / \text{\AA}$             | 1.111 |
| $\theta_{30,28,21} = \theta_{31,28,21} / ^\circ$ | 111.2 |
| $\varepsilon_{21,26}(\text{ethane1}, N)/RT$      | 4.58  |
| $\varepsilon_{21,27}(\text{ethane1}, N)/RT$      | 2.42  |
| $\varepsilon_{30,31}(\text{ethane1}, N)/RT$      | 3.46  |

**Table S6.** The local interaction coefficients,  $\varepsilon_{ij}(\text{ethane2}, N)/RT$  obtained by fitting calculated to observed residual dipolar couplings to the rigid fragment ethane2 of **I22** in the nematic phase.

|                                             |                 |
|---------------------------------------------|-----------------|
| $\varepsilon_{21,28}(\text{ethane2}, N)/RT$ | $3.74 \pm 0.04$ |
| $\varepsilon_{21,29}(\text{ethane2}, N)/RT$ | $1.6 \pm 0.5$   |
| $\varepsilon_{30,31}(\text{ethane2}, N)/RT$ | $0.95 \pm 0.03$ |
| $\varepsilon_{28,32}(\text{ethane2}, N)/RT$ | $0.48 \pm 0.53$ |

**Table S7.** The local interaction coefficients,  $\varepsilon_{ij}(\text{cyclo},N)/RT$ , and the geometrical parameters obtained by fitting calculated to observed residual dipolar couplings for the rigid cyclohexane fragment in the nematic phase at 293 K.

|                                          |                               |
|------------------------------------------|-------------------------------|
| $r_{36,41}=r_{37,43}$                    | $1.106 \pm 0.001 \text{ \AA}$ |
| $r_{36,42} = r_{37,44}$                  | $1.108 \pm 0.009 \text{ \AA}$ |
| $r_{38,45} = r_{39,48}$                  | $1.108 \pm 0.001 \text{ \AA}$ |
| $r_{38,46} = r_{39,47}$                  | $1.097 \pm 0.009 \text{ \AA}$ |
| $r_{40,49}$                              | $1.104 \pm 0.001 \text{ \AA}$ |
| $\delta_{49,40,38,36}$                   | $-64.2^\circ$                 |
| $\varepsilon_{29,32}(\text{cyclo},N)/RT$ | $0.4 \pm 0.1$                 |
| $\varepsilon_{32,35}(\text{cyclo},N)/RT$ | $-2.83 \pm 0.06$              |
| $\varepsilon_{36,37}(\text{cyclo},N)/RT$ | $-4.6 \pm 0.5$                |

**Table S8.** The local interaction coefficients,  $\varepsilon_{ij}(\text{cyclo-ethane},N)/RT$  obtained by fitting calculated to observed residual dipolar couplings to the cyclohexyl-ethane fragment of **I22** in the nematic phase at 293 K.

|                                              |                  |
|----------------------------------------------|------------------|
| $\varepsilon_{21,28}(\text{cyclo-ethane},N)$ | $1.24 \pm 0.08$  |
| $\varepsilon_{21,29}(\text{cyclo-ethane},N)$ | $0.6 \pm 0.1$    |
| $\varepsilon_{30,31}(\text{cyclo-ethane},N)$ | $1.3 \pm 0.2$    |
| $\varepsilon_{33,34}(\text{cyclo-ethane},N)$ | $-2.71 \pm 0.03$ |
| $\varepsilon_{28,32}(\text{cyclo-ethane},N)$ | $-4.5 \pm 0.1$   |

**Table S9.** The local interaction coefficients,  $\varepsilon_{ij}(\text{cyclo-ethyl},N)/RT$  obtained by fitting calculated to observed residual dipolar couplings to the fragment of **I22** in the nematic phase.

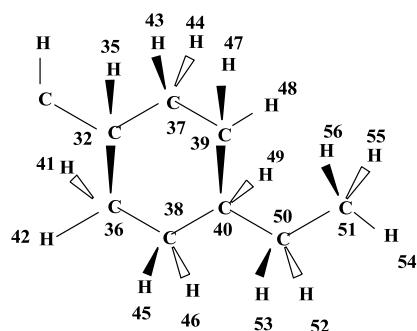

|                                             |                  |
|---------------------------------------------|------------------|
| $\varepsilon_{29,32}(\text{cyclo-ethyl},N)$ | $2.0 \pm 0.3$    |
| $\varepsilon_{32,35}(\text{cyclo-ethyl},N)$ | $-1.93 \pm 0.06$ |
| $\varepsilon_{36,37}(\text{cyclo-ethyl},N)$ | $-3.5 \pm 0.1$   |
| $\varepsilon_{40,51}(\text{cyclo-ethyl},N)$ | $1.6 \pm 0.3$    |
| $\varepsilon_{52,53}(\text{cyclo-ethyl},N)$ | $2.7 \pm 0.5$    |
| $\theta_{50,40,38} / ^\circ$                | $115. \pm 1$     |
| $\theta_{51,50,40} / ^\circ$                | $117.9 \pm 0.1$  |
